# Supplementary material
Source: PubMed Central journal article supplement (PMC6467483)
Supplement: joces-132-224931-s1.pdf [file joces-132-224931-s1.pdf]

## SUPPLEMENTARY INFORMATION

### **Phosphorylation at distinct subcellular locations underlies specificity in mTORC2 activation of SGK1 and Akt**

Catherine E. Gleason<sup>1\*</sup>, Juan A. Oses-Prieto<sup>2</sup>, Kathy H. Li<sup>2</sup>, Bidisha Saha<sup>1</sup>, Gavin Situ<sup>1</sup>, Alma L. Burlingame<sup>2</sup> and David Pearce<sup>1</sup>

<sup>1</sup>Department of Medicine, Division of Nephrology, UCSF, San Francisco, California, USA, 94143; and <sup>2</sup>Departments of Chemistry and Pharmaceutical Chemistry, UCSF, San Francisco, CA, USA, 94143

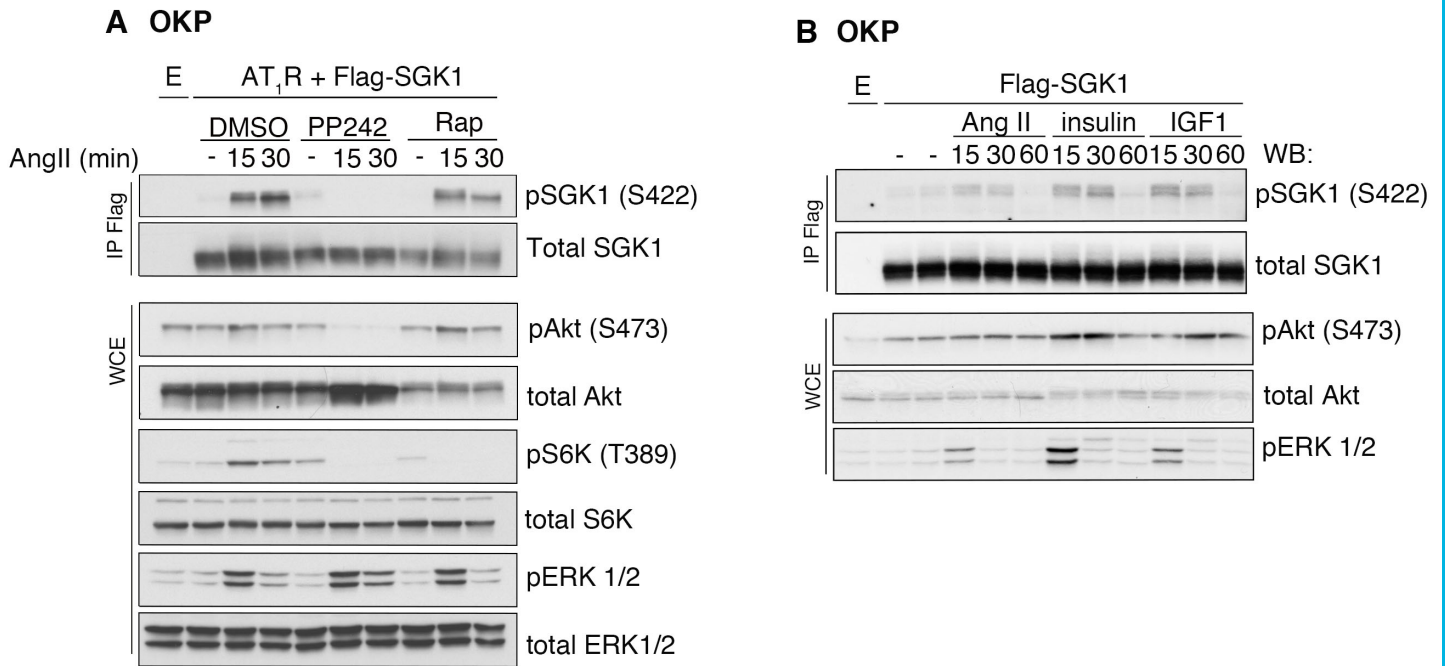

**Figure S1, related to Figure 1. AngII stimulates mTORC2-dependent SGK1 S422 phosphorylation in OKP proximal tubule cells.**

**(A)** Western blot of immunoprecipitates and WCE derived from AT<sub>1</sub>R and Flag-SGK1-transfected OKP cells, serum-starved overnight and then stimulated with 200 nM AngII for the indicated times. E, empty vector.

**(B)** Western blot of immunoprecipitates and WCE derived from Flag-SGK1 transfected OKP cells, serum-starved overnight and then stimulated with either 400 nM AngII, 200 nM insulin or 50 ng/ml IGF1 for the indicated times. E, empty vector.

(A and B, 3 biological replicates)

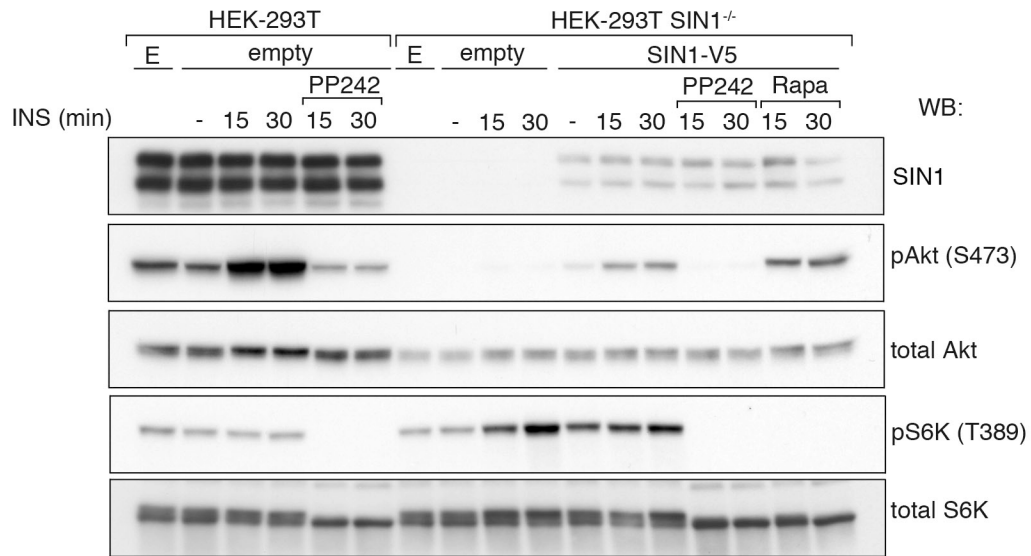

**Figure S2, related to Figure 1. Characterization of HEK-293T SIN1<sup>-/-</sup> cells.** Western blot analysis of WCE derived from either HEK-293T cells transfected with empty vector or HEK-293T SIN1<sup>-/-</sup> cells transfected with empty vector or WT SIN1-V5 as indicated (E, empty vector). Cells were serum-starved overnight before treatment with 200 nM insulin. Where indicated, 300 nM PP242 or 25 nM rapamycin were added. (n=3 biological replicates).

**A. Tryptic digests (83.7% coverage)**

**1 Acc. #:** Q8BKH7 **Uniprot ID:** SIN1\_MOUSE **Species:** MOUSE **Name:** Target of Rapamycin Complex 2 subunit MAPKAP1

**Organism:** Mus musculus **Gene:** Mapkap1 **Existence:** Evidence at protein level **Version:** 1

**Protein MW:** 59009.2 **Protein pI:** 7.2 **Protein Length:** 522 **Index:** 416897

1 MAFLDNP<sup>II</sup> LAHIRQSHVT SDDTGMCEMV LIDHDVDLEK THPPSVPGDS GSEVQGS<sup>SGE</sup> TQGYIYAQSV DITSSWDFGI  
81 RRRSNTAQR<sup>L</sup> ERLRKERQ<sup>NQ</sup> IKCKNIQWKE RNSKQSAQEL KSLFEK<sup>SLK</sup> EKPP<sup>SGKQS</sup> ILSVRLEQCP LQLNPFNEY  
161 SKFDGKGHVG TTATKKIDVY LPLHSSQDRL LPMTVVTMAS ARVQDLIGLI CWQYTSEGRE PKLNDNVSAY CLHIAEDDGE  
241 VDTDFPPLDS NEPIHKFGF<sup>S</sup> TLALVEKYS<sup>S</sup> PGL<sup>TSKESLF</sup> VRINAAG<sup>GF</sup> LIQVDNTKVT MKEILLKAVK R<sup>RRKGS</sup>Q<sup>IKISG</sup>  
321 PQYRLEKQSE PNIAVDLEST LESQNAWEFC LVREN<sup>SRAD</sup> GVFEED<sup>SQID</sup> IATVQDMLSS HHYKSFK<sup>VSM</sup> IHRLRFTTDV  
401 QLGISGDKVE IDPVTN<sup>QKAS</sup> TKFWIK<sup>QKPI</sup> SIDCDLLCAC DLAEKSPSH AVFKLTYLSS HDYKHLYFES DAATVSEIVL  
481 KVN<sup>Y</sup>I<sup>L</sup>ESRA STARADYLAQ KQRKLN<sup>RRRT</sup> FSFQKEK<sup>KSG</sup> QQ

**B. GluC digests (63.2% coverage).**

**Acc. #:** Q8BKH7 **Uniprot ID:** SIN1\_MOUSE **Species:** MOUSE **Name:** Target of Rapamycin Complex 2 subunit MAPKAP1

**Organism:** Mus musculus **Gene:** Mapkap1 **Existence:** Evidence at protein level **Version:** 1

**Protein MW:** 59009.2 **Protein pI:** 7.2 **Protein Length:** 522 **Index:** 416897

1 MAFLDNP<sup>II</sup> LAHIRQSHVT SDDTGMCEMV LIDHDVDLEK THPP<sup>S</sup>VPGDS GSEVQGS<sup>SGE</sup> TQGYIYAQSV DITSSWDFGI  
81 RRRSNTAQR<sup>L</sup> ERLRKERQ<sup>NQ</sup> IKCKNIQWKE RNSKQSAQEL KSLFEK<sup>SLK</sup> EKPP<sup>SSGKQS</sup> ILSVRLEQCP LQLNPFNEY  
161 SKFDGKGHVG TTATKKIDVY LPLHSSQDRL LPMTVVTMAS ARVQDLIGLI CWQYTSEGRE PKLNDNVSAY CLHIAEDDGE  
241 VDTDFPPLDS NEPIHKFGFS TLALVEKYS<sup>S</sup> PGL<sup>TSKESLF</sup> VRINAAG<sup>GF</sup> LIQVDNTKVT MKEILLKAVK R<sup>RRKGS</sup>Q<sup>IKISG</sup>  
321 PQYRLEKQSE PNIAVDLEST LESQNAWEFC LVREN<sup>SRAD</sup> GVFEED<sup>SQID</sup> IATVQDMLSS HHYKSFK<sup>VSM</sup> IHRLRFTTDV  
401 QLGISGDKVE IDPVTN<sup>QKAS</sup> TKFWIK<sup>QKPI</sup> SIDCDLLCAC DLAEKSPSH AVFKLTYLSS HDYKHLYFES DAATVSEIVL  
481 KVN<sup>Y</sup>I<sup>L</sup>ESRA STARADYLAQ KQRKLN<sup>RRRTS</sup> FSFQKEK<sup>KSG</sup> QQ

**Figure S3, related to Figure 5. Sequence coverage maps of the MS analysis of SIN1.** A) Tryptic digestion; B) GluC digestion. Peptides identified in the MS analysis of the enzymatic digestions are shown in red. Unambiguous phosphorylation sites are highlighted in dark blue. Ambiguous assignments are shown in green.

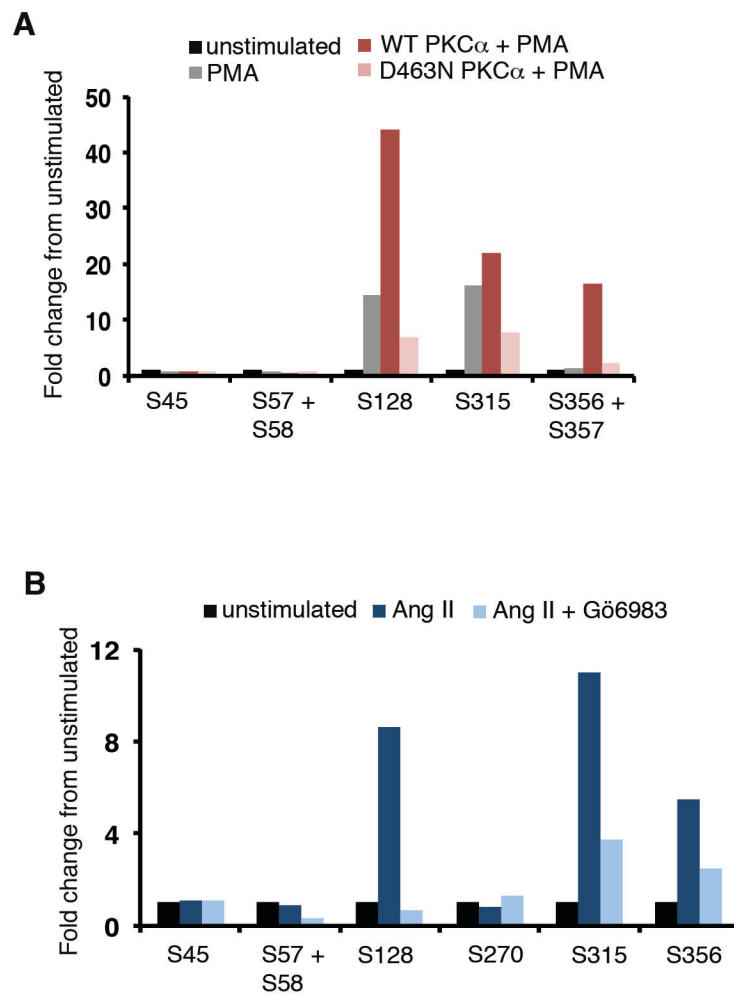

**Figure S4, related to Figure 5. Identification of SIN1 phosphorylation sites by LC-MS/MS phospho-site mapping.**

**(A)** Relative quantification of phosphopeptide abundance. HEK-293 cells were transfected with empty vector, SIN1-Flag, and either WT PKC $\alpha$  or PKC $\alpha$ D463N. Cells were left unstimulated or stimulated with 1 mM PMA as indicated for 15 min.

**(B)** HEK-293-AT<sub>1</sub>R cells were transfected with empty vector or SIN1-Flag followed by stimulation with 200 nM Ang II either in the presence of DMSO (vehicle) or the PKC inhibitor, Gö6983 (5 mM) for 60 min.

Both A and B show MS results for GluC SIN1-flag digestion. Graphs depict fold change in phosphopeptide abundance from the unstimulated condition for one representative experiment. (A and B, 3 biological replicates)

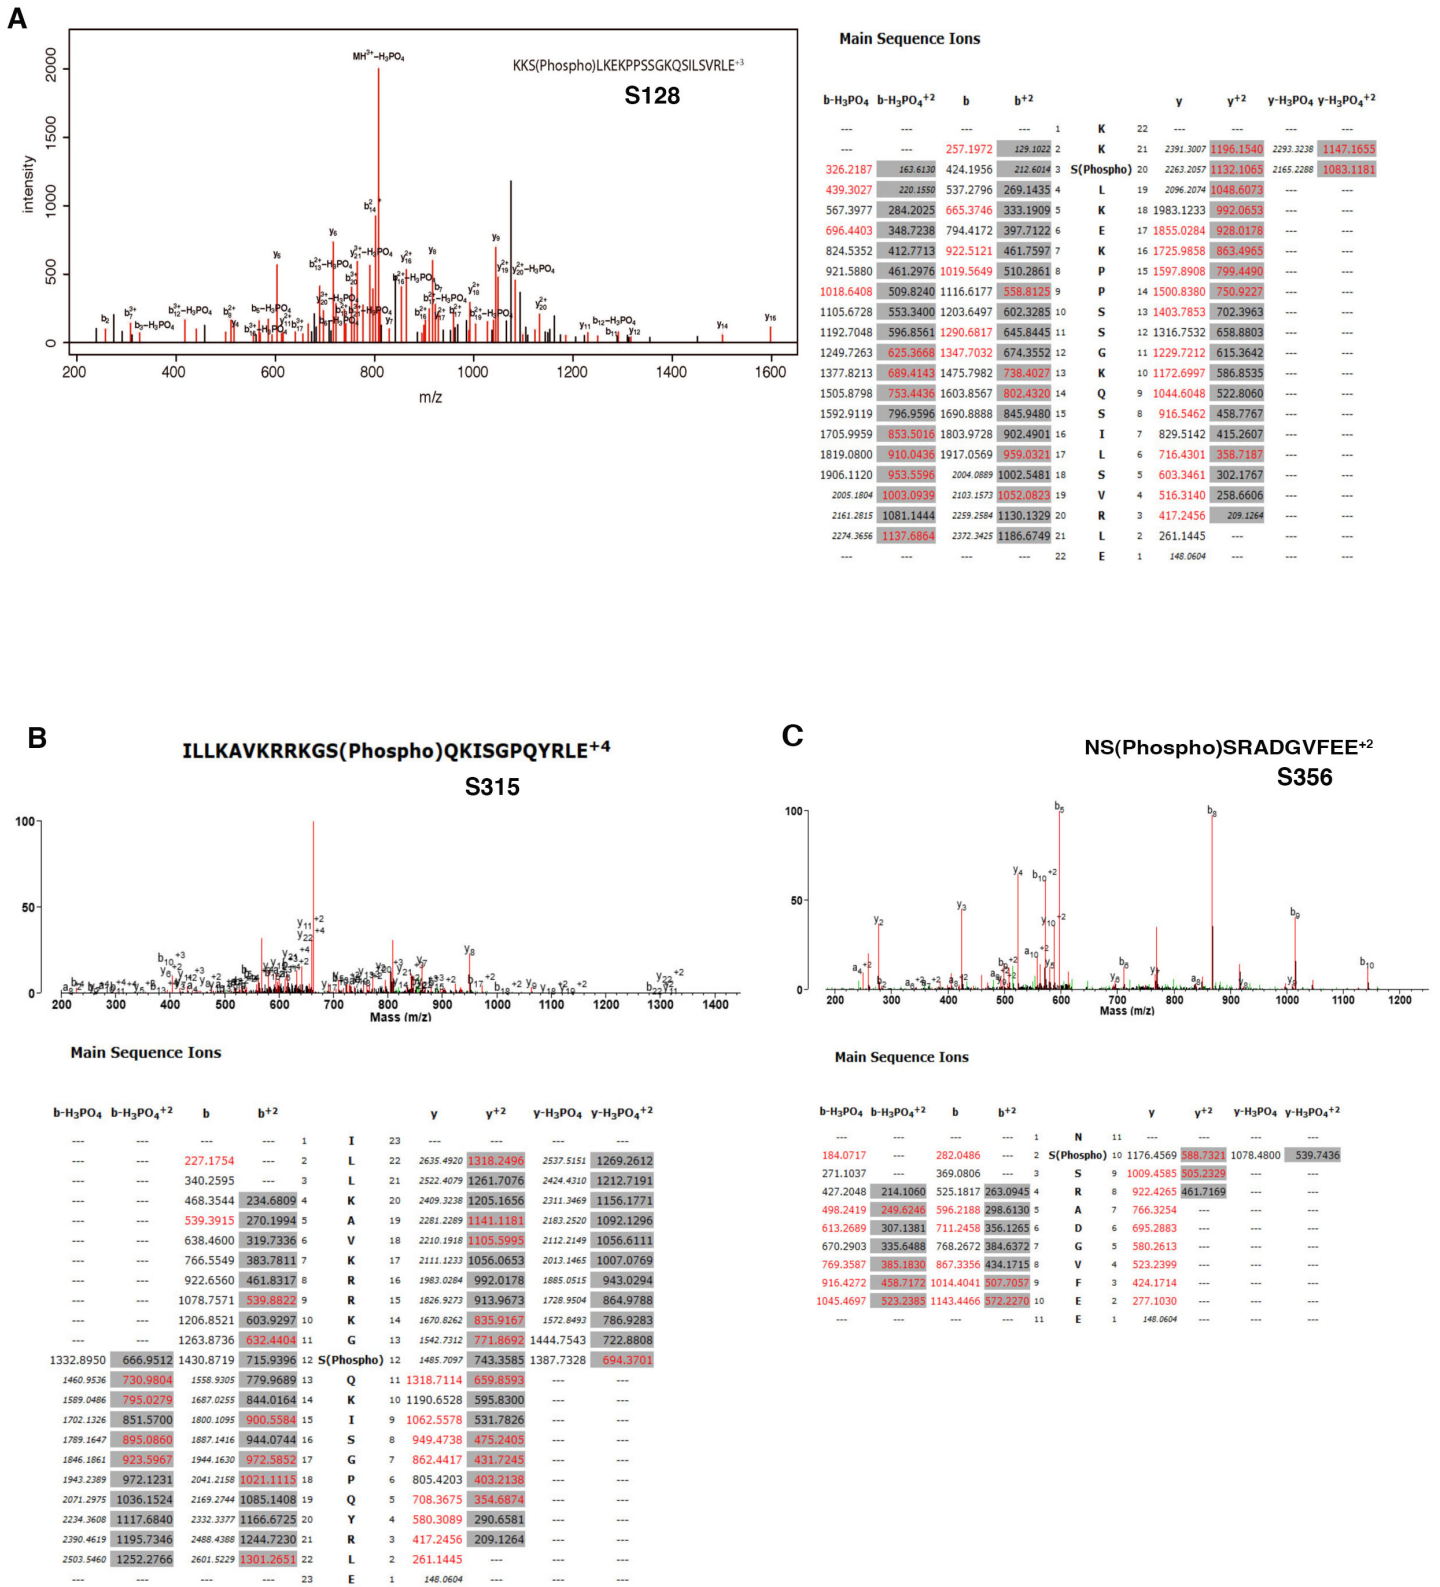

Figure S5, related to Figure 5. Annotated LC-MS/MS identifying Ang II-sensitive phosphorylation sites. A) S128; B) S315; C) S356. Observed b and y ions are shown in red in the ion spectra plots and tables.

**A HEK-293T**

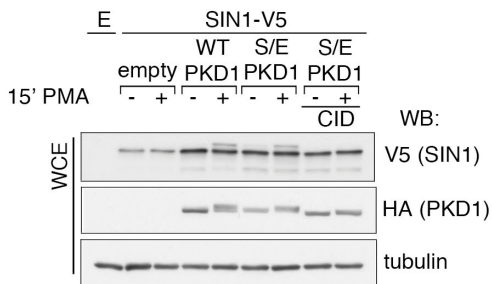

**B HEK-293T**

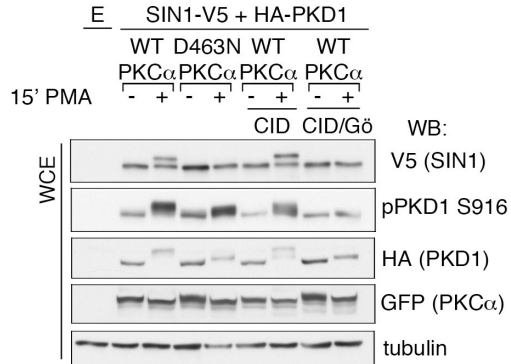

**Figure S6, related to Figure 5. PKD activation induces phosphorylation of SIN1.**

**(A)** WB analysis of WCE derived from HEK-293T cells transfected with empty vector, WT PKD1 or constitutively active PKD1 (S738/742E) and WT SIN1-V5. Cells were serum-starved overnight before stimulation with 1  $\mu$ M PMA either in the presence of vehicle (DMSO) or 25  $\mu$ M CID655763 (CID). E, empty vector.

**(B)** WB analysis of WCE derived from HEK-293T cells transfected with WT SIN1-V5 and HA-PKD1 and either WT PKC $\alpha$  or PKC $\alpha$ D463N. Cells were stimulated with PMA in the presence of the indicated inhibitors (5  $\mu$ M Gö6976 (Gö), 25  $\mu$ M CID655763 (CID)) as described in 'B'. E, empty vector.

(A and B, 2 biological replicates)



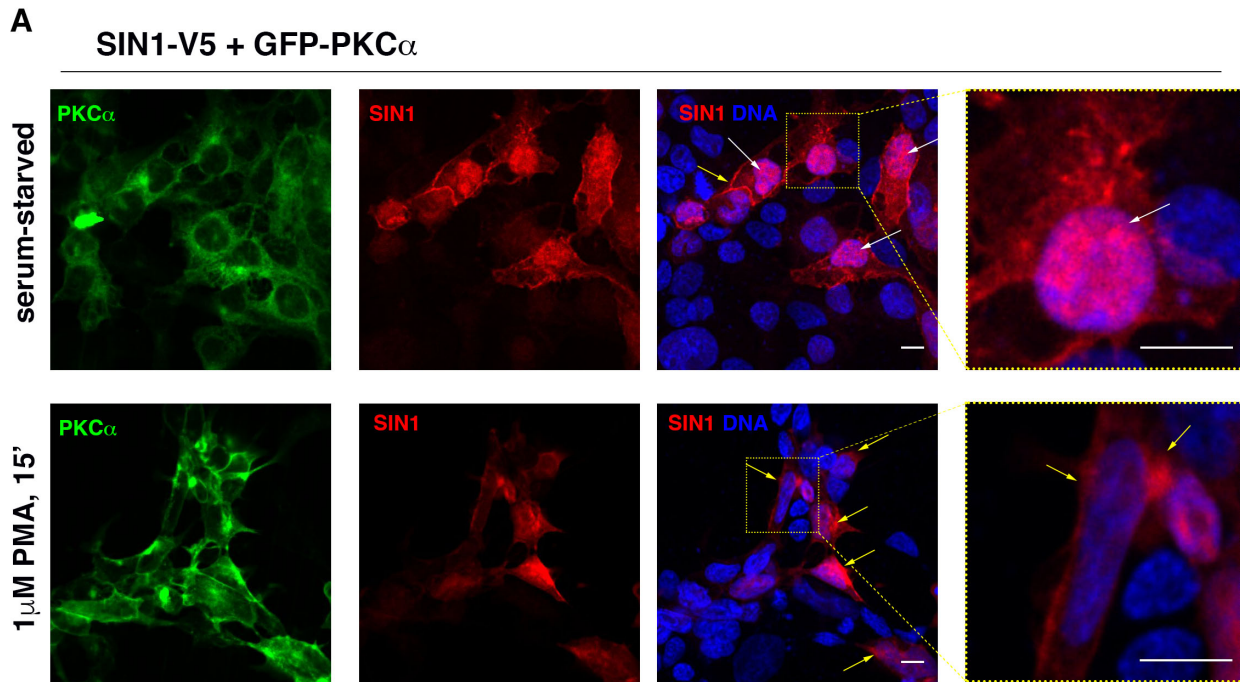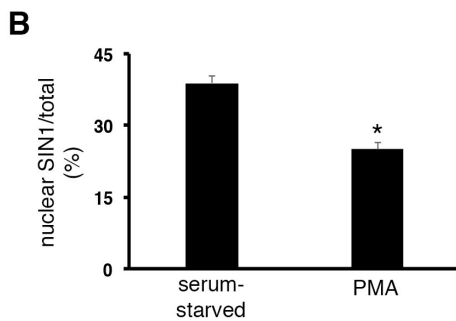

**Figure S7, related to Figure 7. PKC $\alpha$  activation relocates SIN1 from the nucleus to a perinuclear compartment and plasma membrane.**

(A) SIN1<sup>-/-</sup> HEK-293T cells expressing WT GFP-PKC $\alpha$  and WT SIN1-V5 were serum-starved overnight and then left unstimulated or stimulated with 1  $\mu$ M PMA for 15 min. Cells were then processed in a immunofluorescence assay to detect SIN1, costained with DAPI to detect nuclei and imaged by confocal microscopy. White arrows indicate nuclear localized SIN1 and yellow arrows indicate plasma membrane and peri-nuclear localized SIN1. Scale Bar, 10  $\mu$ M.

(B) Quantification of nuclear SIN1 localization as a percentage of total SIN1. Graph represents mean  $\pm$  SEM \* $p < 0.001$ . (n= 2 biological replicates; serum-starved n=32 cells; PMA-treated, n=53 cells)



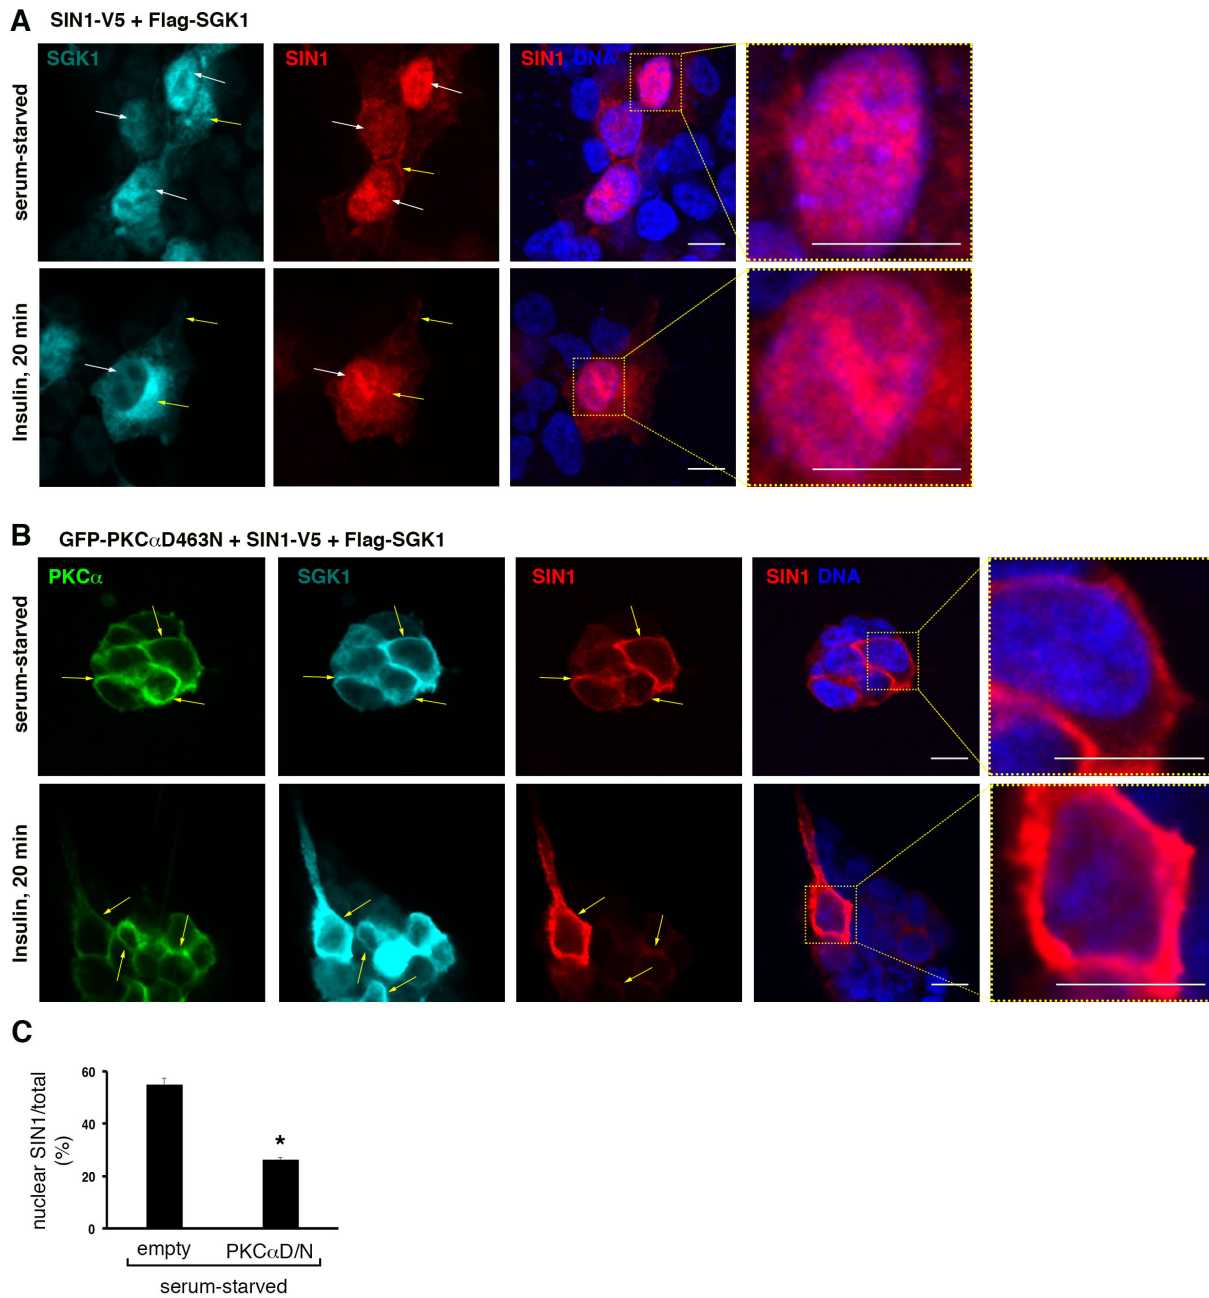

**Figure S8, related to Figure 7. PKC $\alpha$ D463N relocates SIN1 and SGK1 from the nucleus and peri-nuclear compartment to the plasma membrane in the absence of hormonal stimulation.** SIN1<sup>-/-</sup> HEK-293T cells expressing WT SIN1-V5, Flag-SGK1 and either empty vector (A) or GFP-PKC $\alpha$ D463N (PKC $\alpha$ D/N) (B) were serum-starved over night and then left unstimulated or stimulated with 200nM insulin for 20 min. Cells were then processed in an immunofluorescence assay to detect SIN1 or SGK1, costained with DAPI to detect nuclei and imaged by confocal microscopy. White arrows indicate nuclear localized SIN1 and SGK1 and yellow arrows indicate plasma membrane and peri-nuclear staining. (n=4 biological replicates for empty vs PKCDN, serum-starved; n=3 biological replicates for empty vs PKCDN, insulin stimulated) (C) Quantification of nuclear localized SIN1 as a percentage of total in serum-starved cells. Graph represents the mean  $\pm$  SEM. \*p < 0.0001 (WT serum-starved, n=38 cells; PKC $\alpha$ D/N serum-starved, n=54 cells).

**Table S1. List of phosphopeptides identified in SIN1 by LC-MS/MS (tryptic digestions)**

| Expectation value | Phosphopeptide                    | Phosphorylation     | <i>m/z</i> | Charge |
|-------------------|-----------------------------------|---------------------|------------|--------|
| 5.30E-05          | M(Met-loss+Acetyl)AFLDNPT*IILAHIR | T8                  | 858.4505   | 2+     |
| 6.60E-04          | SLFEKKS*LK                        | S128                | 580.3101   | 2+     |
| 9.20E-03          | EKPPS*SGKQSILSVR                  | 135I136 (ambiguous) | 846.9397   | 2+     |
| 6.00E-05          | FGFS*TLALVEK                      | S260                | 646.3203   | 2+     |
| 1.20E-04          | YSS*PGLTSK                        | S270                | 510.2264   | 2+     |
| 4.60E-05          | YSSPGLTS*KESLFVR                  | 274I275 (ambiguous) | 875.9246   | 2+     |
| 3.30E-04          | YSSPGLTSKES*LFVR                  | S278                | 875.9249   | 2+     |
| 3.10E-05          | INAAHGFS*LIQVDNTK                 | S290                | 904.4411   | 2+     |
| 1.80E-05          | INAAHGFS*LIQVDNTKVTMK             | S290                | 756.3809   | 3+     |
| 1.10E-03          | KGS*QKIS*GPQYR                    | S315                | 754.8399   | 2+     |
| 5.70E-04          | GSQKIS*GPQYR                      | S319                | 650.8057   | 2+     |
| 1.10E-03          | KGS*QKIS*GPQYR                    | S315 and S319       | 754.8399   | 2+     |
| 1.70E-04          | ENSS*RADGVFEEDSQIDIATVQDM+LSSHYYK | 356I357 (ambiguous) | 901.8951   | 4+     |
| 3.00E-03          | ENSS*RADGVFEEDSQIDIATVQDMLSSHYYK  | 356I357 (ambiguous) | 897.8961   | 4+     |
| 1.70E-03          | ADGVFEEDS*QIDIATVQDMLSSHYYK       | S367                | 1005.7702  | 3+     |
| 2.60E-03          | RTS*FSFQK                         | S510                | 540.7474   | 2+     |

S\* or T\* denotes phosphorylated serine or threonine. M† denotes oxidized methionine.

**Table S2. List of phosphopeptides identified in SIN1 by LS-MS/MS (GluC digestions)**

| <b>Expectation value</b> | <b>Phosphopeptide</b>    | <b>Phosphorylation</b> | <b>m/z</b> | <b>Charge</b> |
|--------------------------|--------------------------|------------------------|------------|---------------|
| 1.80E-05                 | KTHPPS*VPGDSGSE          | S45                    | 737.8126   | 2+            |
| 1.30E-04                 | KTHPPSVPGDSGSEVQGS*S*GE  | S57;S58                | 1099.9342  | 2+            |
| 2.30E-04                 | KKS*LKEKPPSSGKQSILSVRLE  | S128                   | 840.4711   | 3+            |
| 1.60E-03                 | KYSS*PGLTSKE             | S270                   | 638.7895   | 2+            |
| 2.60E-03                 | ILLKAVKRRKGS*QKISGPQYRLE | S315                   | 687.9012   | 4+            |
| 1.10E-03                 | NS*SRADGVFEE             | S356                   | 645.7535   | 2+            |

S\* or T\* denotes phosphorylated serine or threonine.
